# Supplementary material
Source: PubMed Central journal article supplement (PMC2847452)
Supplement: NIHMS187621-supplement-Figures.pdf [file NIHMS187621-supplement-Figures.pdf]

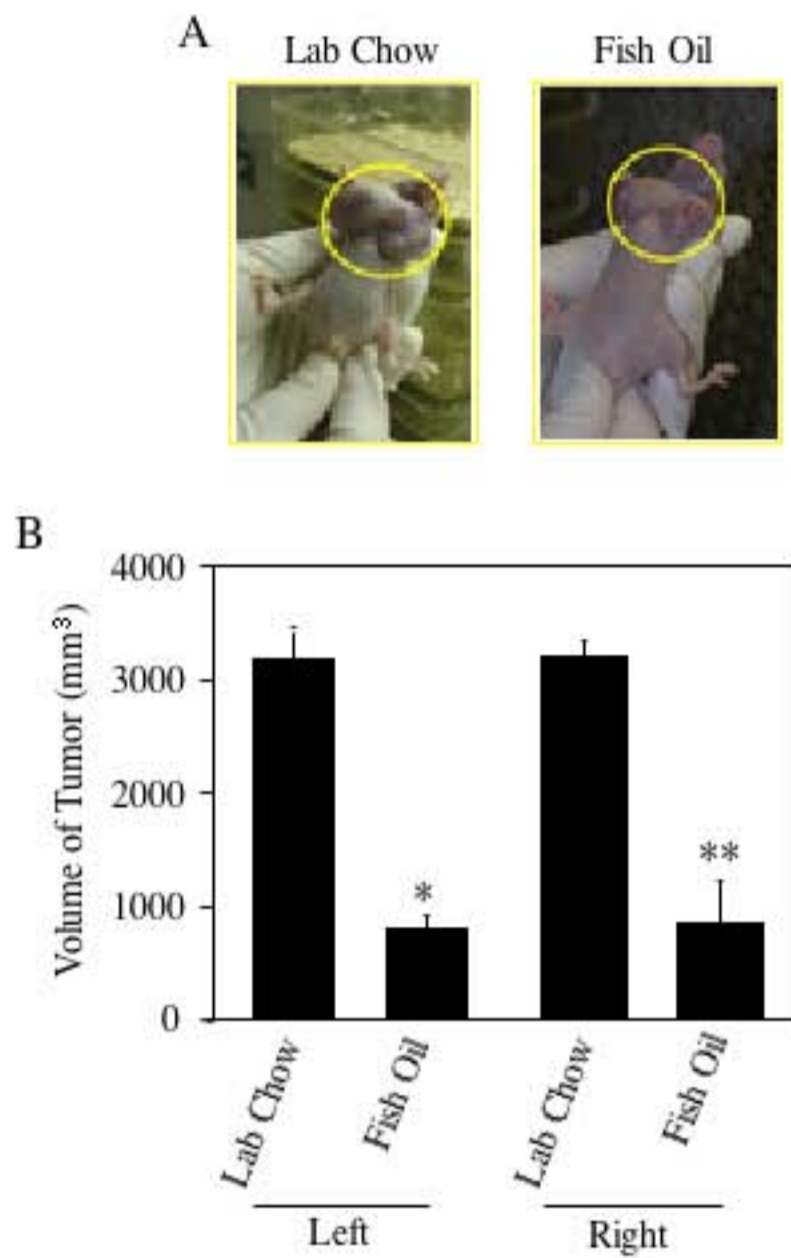

**Supplementary Fig. S1.** (A) Mouse fed either lab chow or fish oil bearing the tumors in the breast is shown at three weeks. Yellow circles indicate the tumors. (B) The tumor volume in the left and right breasts is shown from mice fed lab chow and fish oil as indicated. Mean  $\pm$  SE of results from five animals is shown. \* $p < 0.001$  and \*\* $p < 0.014$  vs. lab chow fed animals.

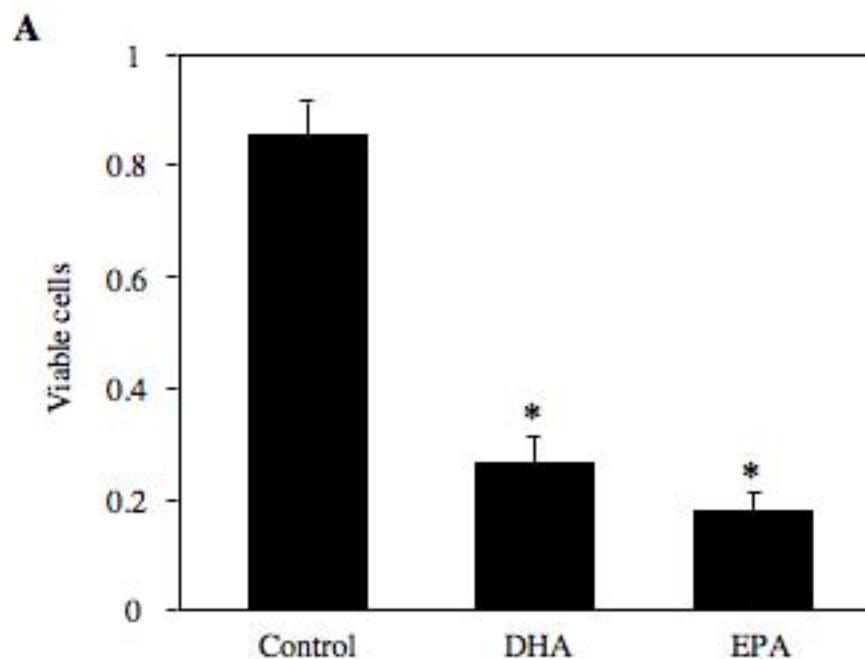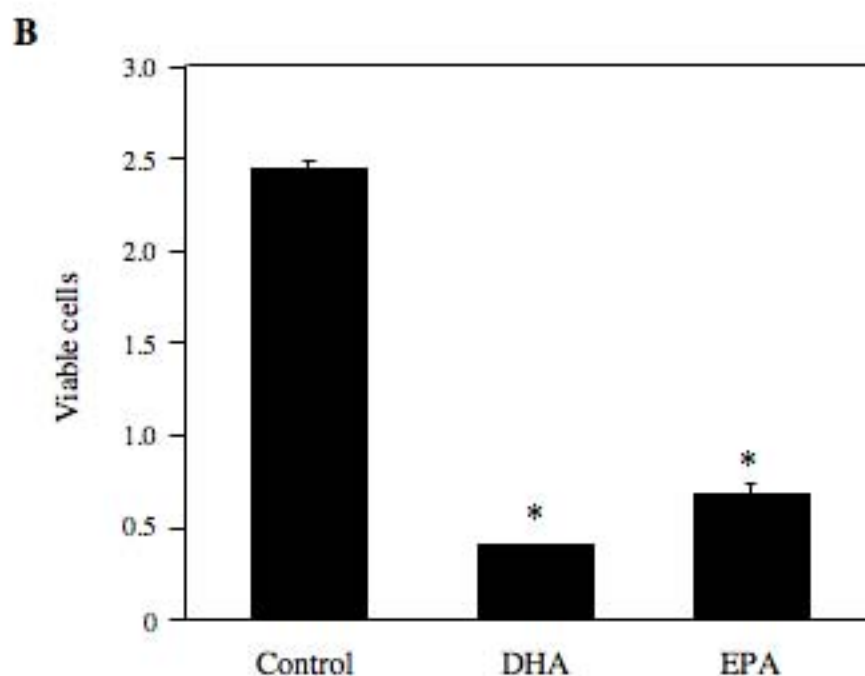

**Supplementary Fig. S2.** MDA MB-231(panel A) and ZR75-1 (panel B) cells were incubated with DHA or EPA as indicated for 24 hours. The viability of cells were determined by MTT ([3-(4,5-dimethylthiazol-2,5-diphenyl tetrazolium bromide)] assay. Briefly, 50  $\mu$ l of 5 mg/ml MTT was added to the culture medium (1 ml/well) of MDA MB-231 or ZR75-1 cells and incubated for 4 hours at 37°C in a humidified atmosphere with 5% CO<sub>2</sub>. The medium was removed and 200  $\mu$ l of DMSO was added to each well. The absorbance of the dissolved dye was measured at 540 nm. \*p < 0.001 vs. lab chow fed animals.

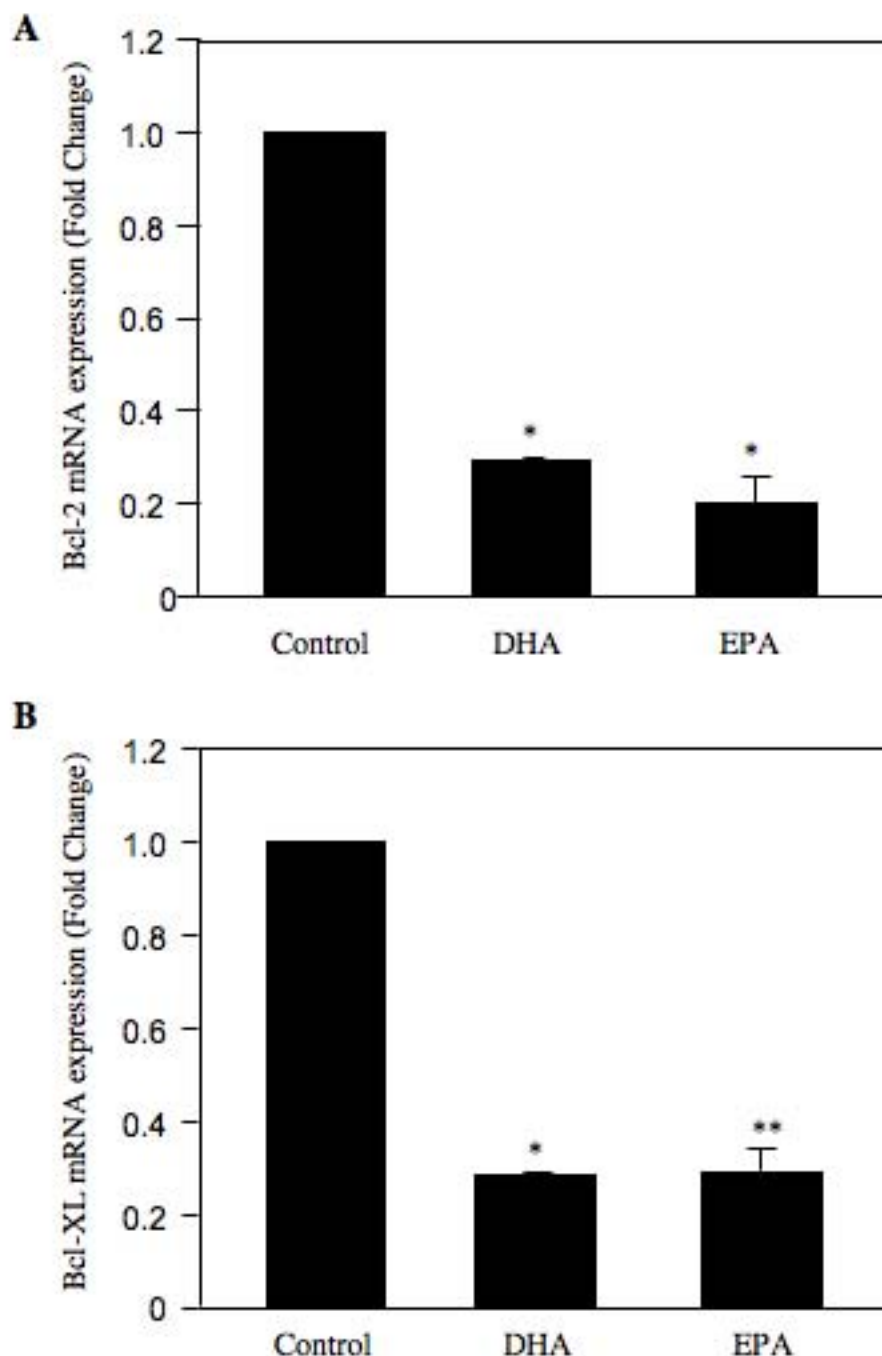

**Supplementary Fig. S3.** ZR75-1 cells were incubated with DHA or EPA as indicated. Total RNA was isolated and used in real time qRT-PCR to detect Bcl-2 (panel A) and Bcl-XL (panel B) mRNAs as described in the Experimental Procedures in the article. The expression of mRNA was normalized to GAPDH mRNA. Mean  $\pm$  SE of triplicate measurements is shown. \* $p < 0.001$  vs control by ANOVA. In Panel B, \*\* $p < 0.01$  vs control by ANOVA. These results indicate that DHA as well as EPA significantly reduced the expression of anti-apoptotic genes Bcl-2 and Bcl-XL.

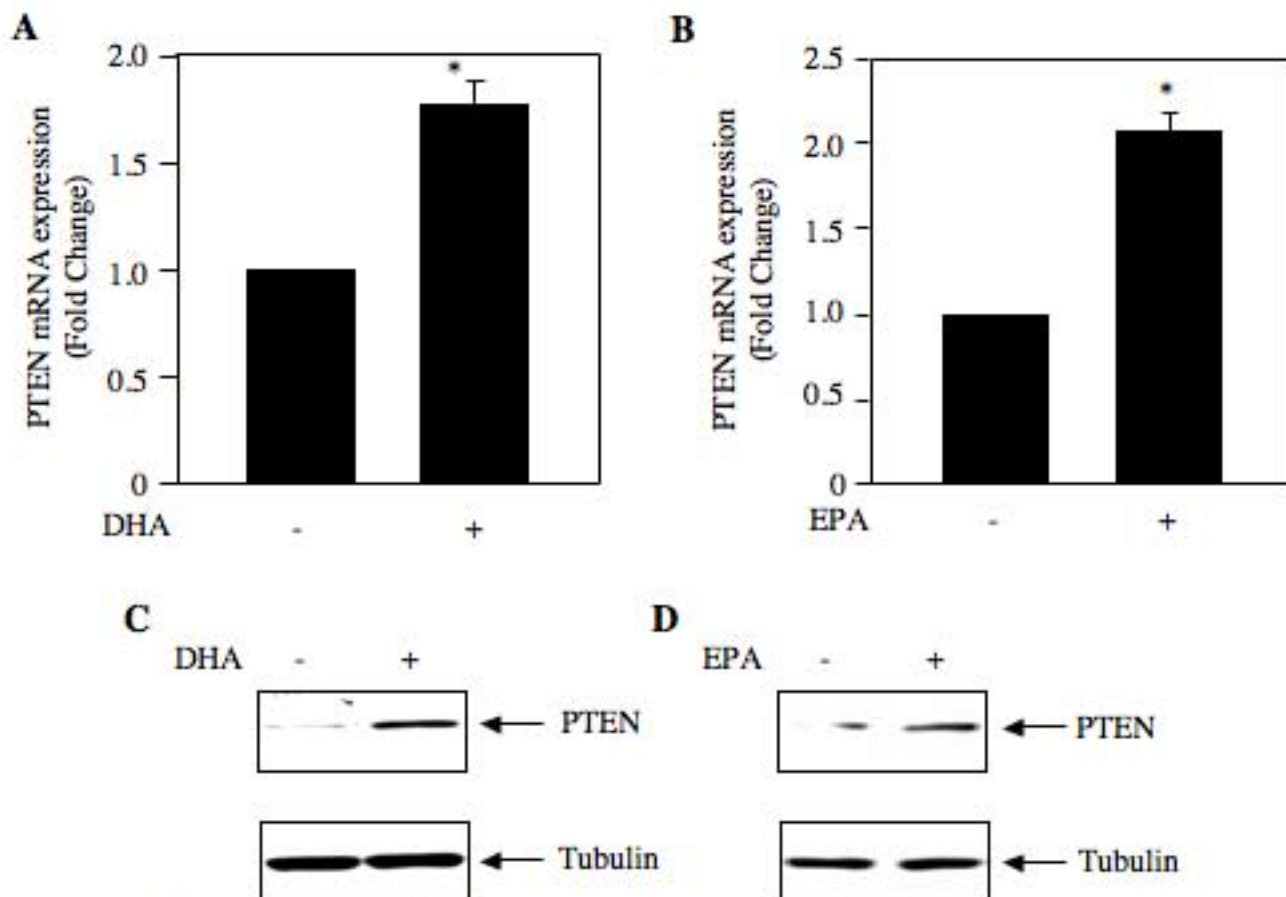

**Supplementary Fig. S4.** ZR75-1 cells were incubated with DHA (panels A and C) or EPA (panels B and D) as indicated. (A and B) Total RNA was used to detect PTEN mRNA expression by real time qRT-PCR as described in Fig. 6C and 6D in the article. Mean  $\pm$  SE of triplicate measurements is shown. \* $p < 0.05$  vs control in panel A; \* $p < 0.01$  vs control in panel B. (C and D) The cell lysates were immunoblotted with PTEN and tubulin antibodies as indicated. Both DHA and EPA increased expression of PTEN mRNA and protein.
